# Supplementary material
Source: publisher site journal article supplement (https://db.degruyter.com/publication/dbid/tlm/downloadAsset/TLM_TLM_CLAE_Map_of_Localities.pdf)

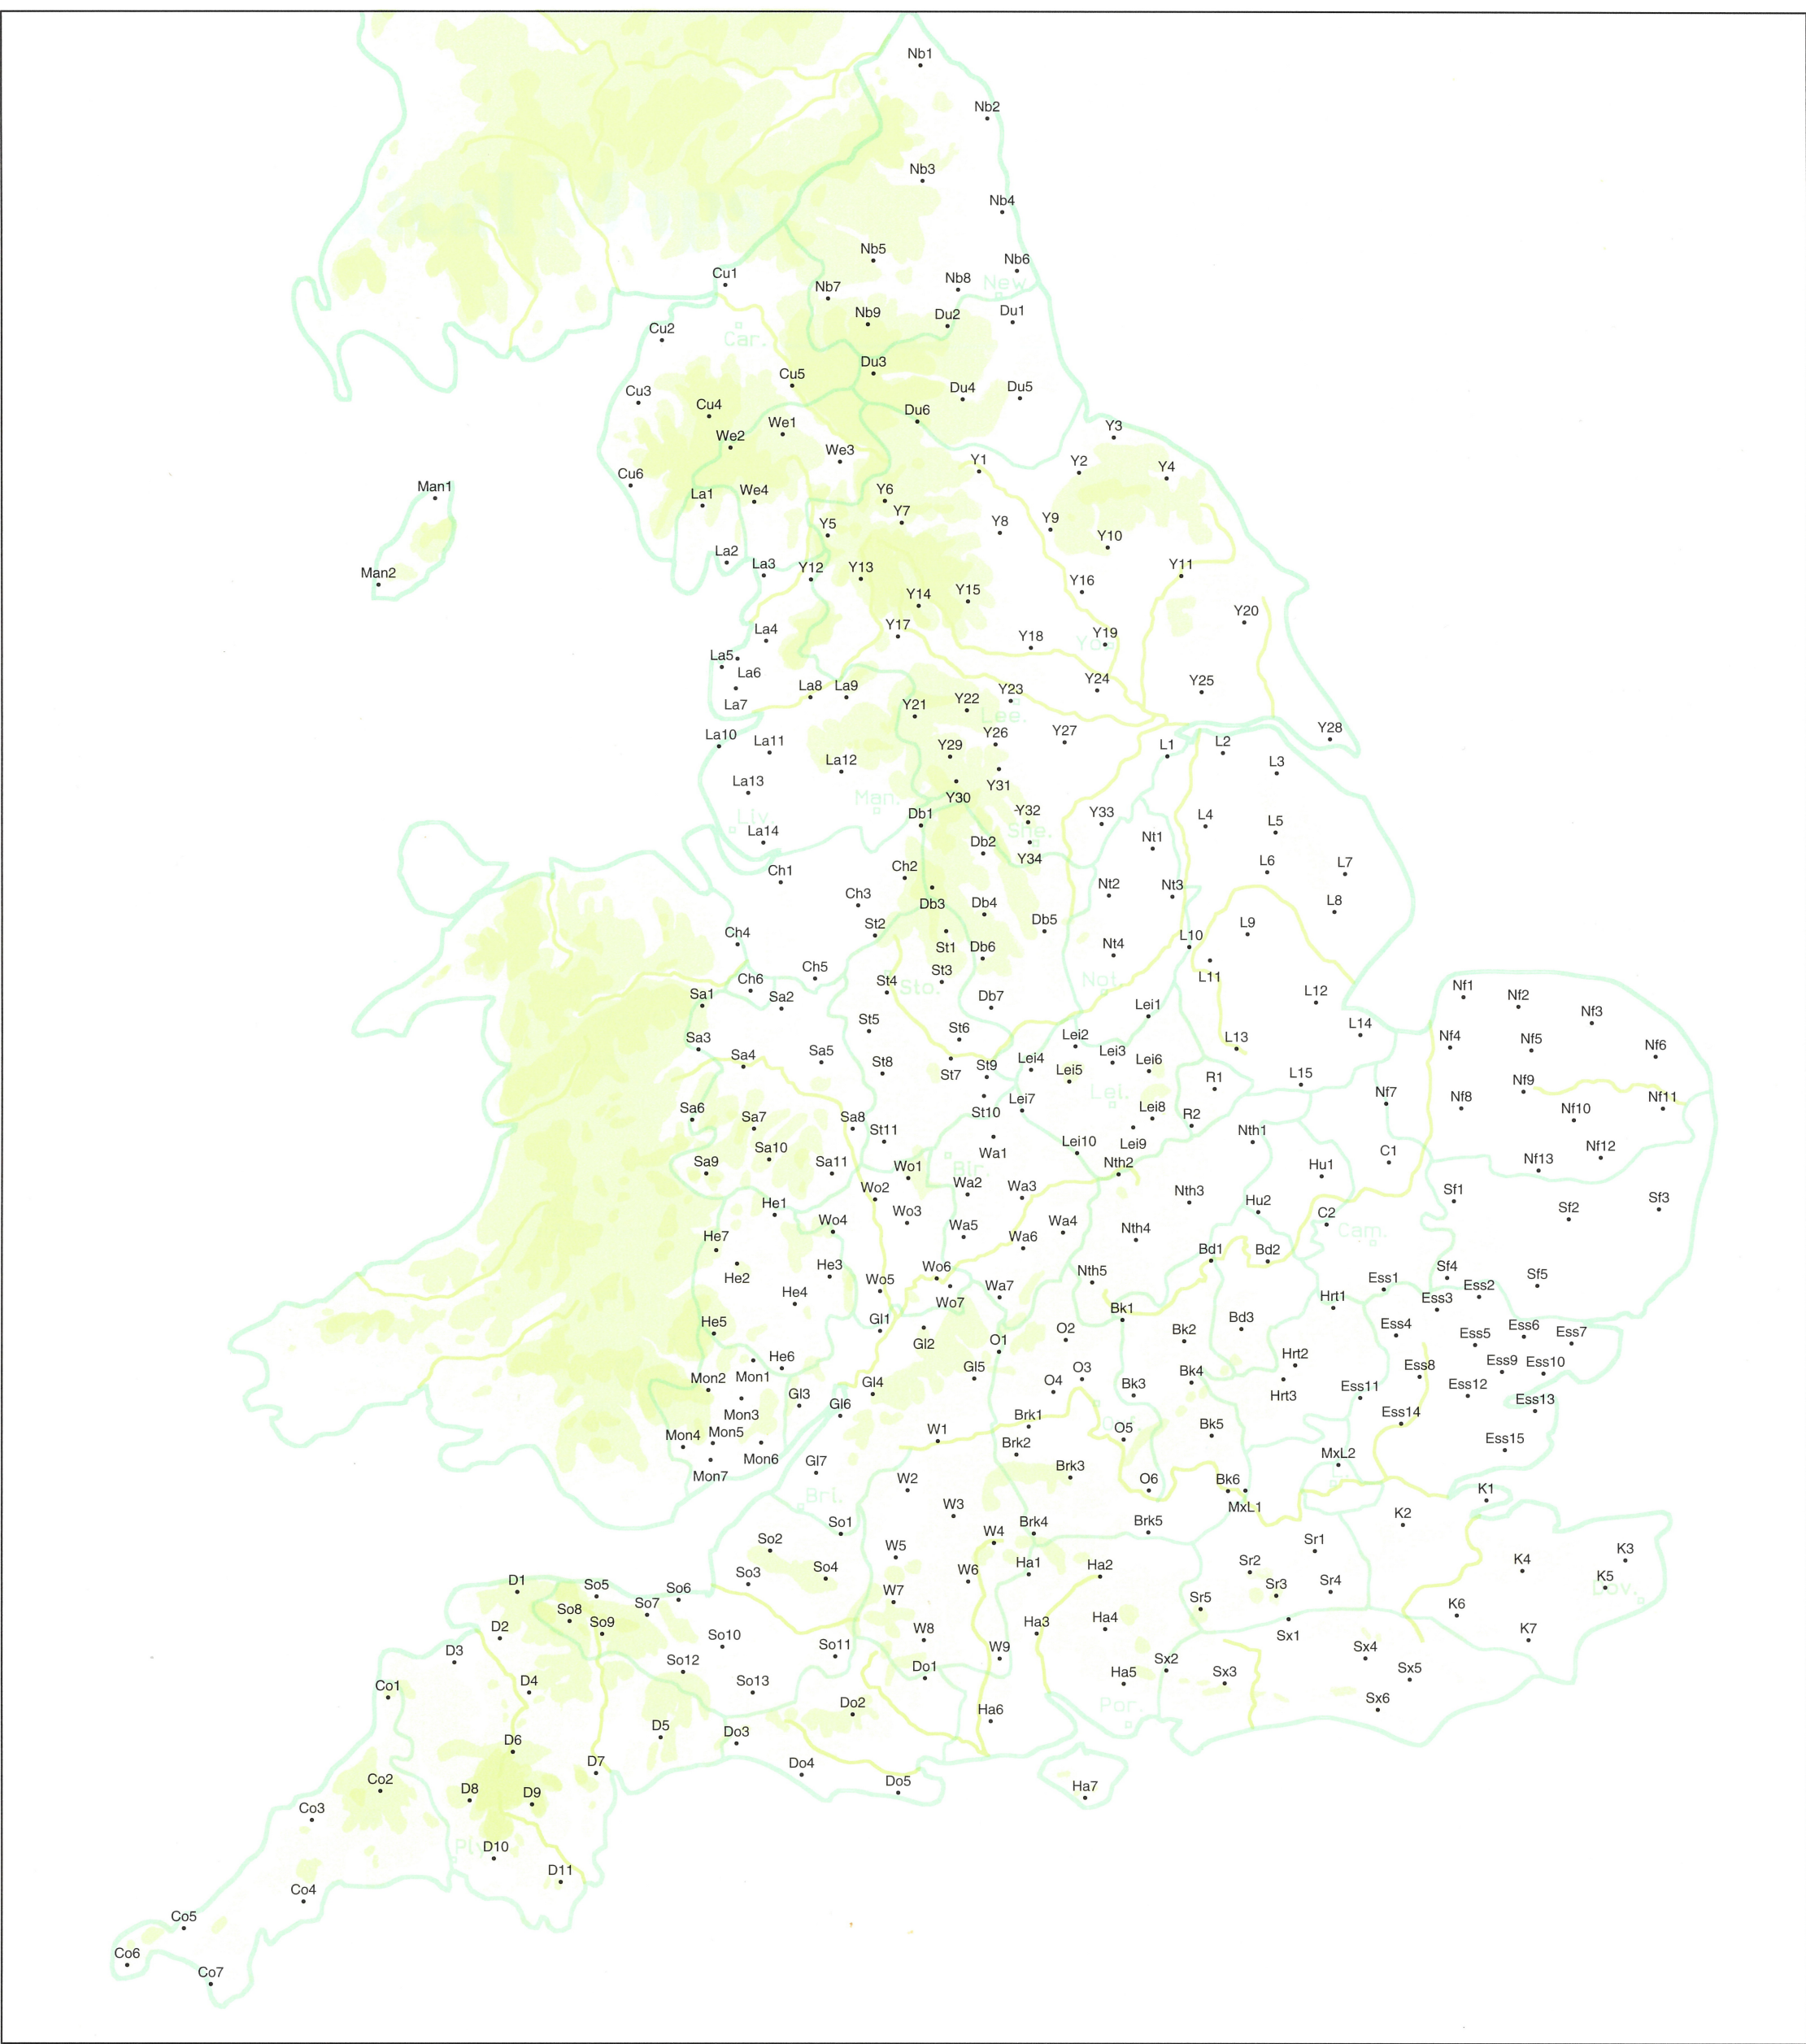

The Computer Developed Linguistic Atlas of England: Map of Localities

Supplement: Supplementary file 1 [file TLM_TLM_CLAE_Map_of_Localities.pdf]
